# Supplementary material
Source: Springer Nature journal article supplement (https://www.springermedizin.de/resource/supplementary/12891_2006_239_MOESM1_ESM.pdf/9510818)
Supplement: MOESM1 [file 9510818]

**Describe your pain on the pain drawing.**

32. Use the appropriate symbols:

$\backslash$  Numbness

$\parallel$  Stabbing

$\times$  Burning

$\circ\circ$  Stiffness

$\dots$  Pins and needles

$=$  Dull aching

$\text{ss}$  Cramps

*Framsida*

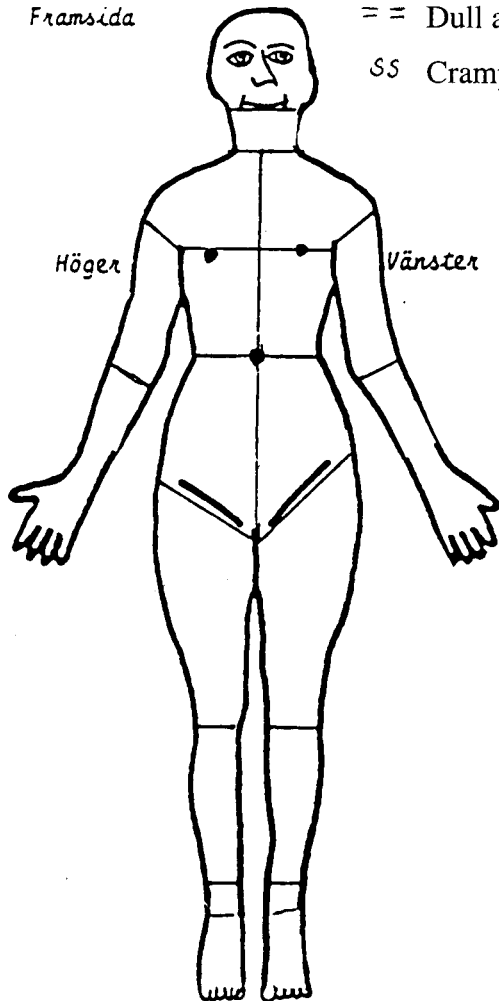

*Höger*

*Vänster*

*Baksida*

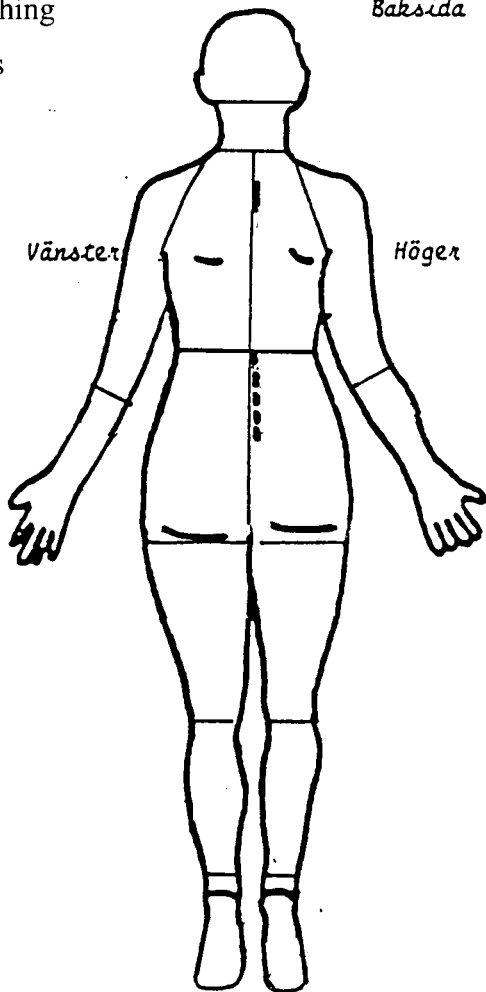

*Vänster*

*Höger*
